# Supplementary material for: Durable responses to alectinib in murine models of EML4-ALK lung cancer requires adaptive immunity
Source: PubMed Central journal article supplement (PMC9899278; doi:10.1038/s41698-023-00355-2), 2023-02-04
Supplement: 41698_2023_355_MOESM1_ESM.pdf [file 41698_2023_355_MOESM1_ESM.pdf]

## Supplementary Information

### **Durable responses to alectinib in murine models of EML4-ALK lung cancer requires adaptive immunity**

Emily K. Kleczko<sup>1</sup>, Trista K. Hinz<sup>2,5</sup>, Teresa T. Nguyen<sup>2</sup>, Natalia J. Gurule<sup>2</sup>, Andre Navarro<sup>1</sup>, Anh T. Le<sup>1</sup>, Amber M. Johnson<sup>1</sup>, Jeff Kwak<sup>1</sup>, Diana I. Polhac<sup>2</sup>, Eric T. Clambey<sup>3</sup>, Mary Weiser-Evans<sup>1</sup>, Daniel T. Merrick<sup>4</sup>, Michael C. Yang<sup>4</sup>, Tejas Patil<sup>1</sup>, Erin L. Schenk<sup>1,\*</sup>, Lynn E. Heasley<sup>2,5,\*</sup>, Raphael A. Nemenoff<sup>1,\*</sup>

<sup>1</sup>Departments of Medicine, <sup>2</sup>Craniofacial Biology, <sup>3</sup>Anesthesiology and Pathology<sup>4</sup>, University of Colorado Anschutz Medical Campus, Aurora, CO, USA

<sup>5</sup>Eastern Colorado VA Healthcare System, Rocky Mountain Regional VA Medical Center, Aurora, Colorado, USA

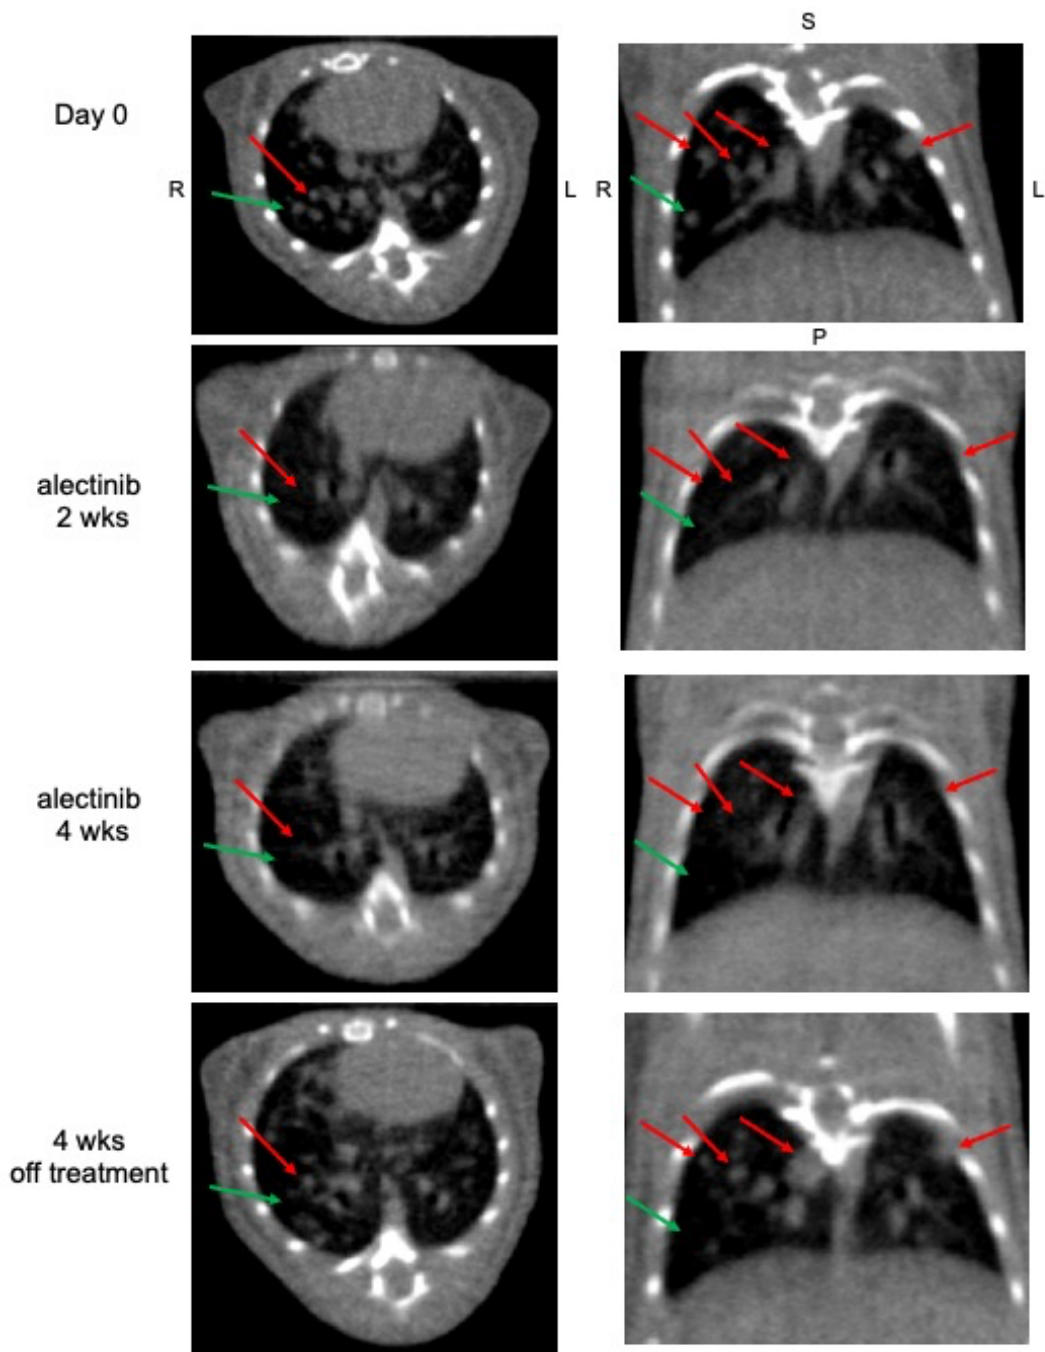

**Supplementary Figure 1. Alectinib sensitivity of primary murine EML4-ALK tumors.** Recombinant adenoviruses encoding Cas9 and gRNAs targeting *Eml4* and *Alk* were instilled intratracheally into C57BL/6 mice. The mice were routinely monitored by  $\mu$ CT for emergence of lung tumors and after 8 weeks (Day 0 in figure), mice were submitted to daily oral gavage with alectinib (20 mg/kg) and  $\mu$ CT

continued on a weekly basis. Following 4 weeks of alectinib treatment, therapy was terminated and  $\mu$ CT imaging continued. Serial images of an alectinib-treated mouse (representative of 4 others) are shown. R = right, L = left, S = superior, P = posterior. Red arrows identify lesions that shrank upon alectinib treatment and subsequently re-grew following therapy termination. Green arrows identify lesions that shrank with treatment and did not regrow upon termination of alectinib therapy.

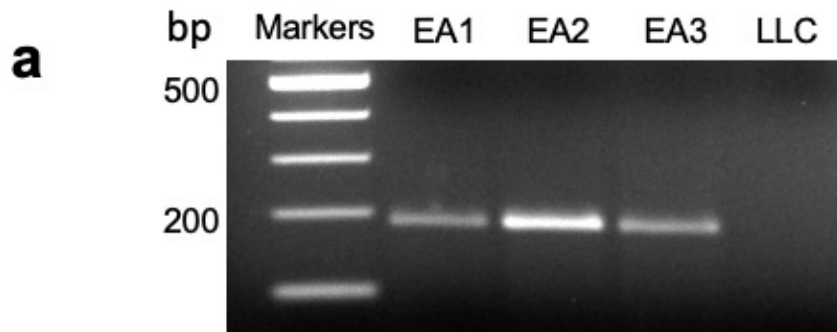

**b**

| RNA expression, CPM |      |      |      |      |
|---------------------|------|------|------|------|
| Gene                | EA1  | EA2  | EA3  | LLC  |
| ALK                 | 646  | 1204 | 700  | 0    |
| MAPK1               | 1756 | 2602 | 1577 | 1664 |

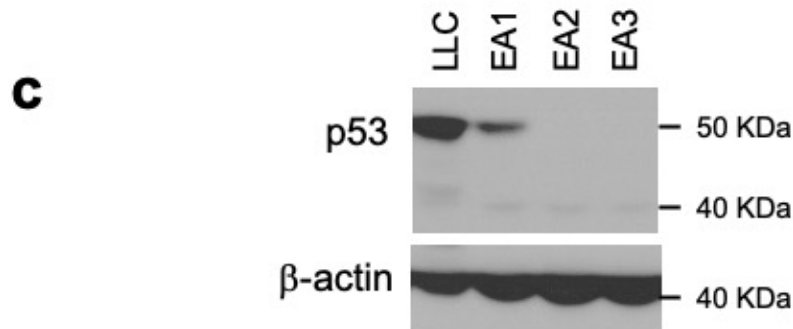

**Supplementary Figure 2. RNA expression of EML4-ALK in murine cell lines.** **a**, RNA was purified from EA1, EA2 and EA3 cells and submitted to reverse transcription PCR to amplify the coding sequences expressed from the rearranged EML4-ALK gene fusion. **b**, RNAseq data from the cell lines was queried for ALK mRNA expression with MAPK1 as a control house-keeping gene. The LLC cell line is a KRAS mutant line that does not express ALK. **c**, Cell extracts were prepared from the indicated murine cell lines and submitted to immunoblot analysis for TP53 and  $\beta$ -actin as a loading control. LLC cells bear a missense mutation in TP53, EA1 was developed in TP53 wild-type mice and EA2 and EA3 were generated in TP53 null mice.

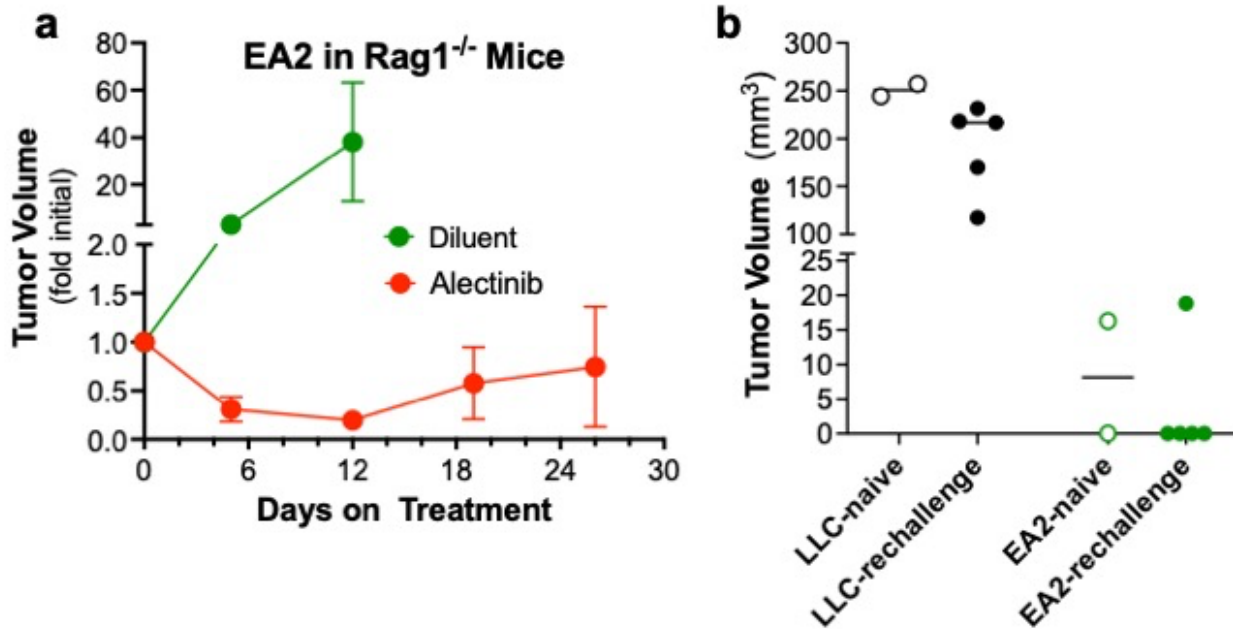

**Supplementary Figure 3. Lack of alectinib-treatment durability in EA2-bearing Rag1<sup>-/-</sup> mice and evidence for immunologic memory following alectinib-induced EA2 tumor elimination.** **a**, EA2 cells (500,000 cells/mouse) were inoculated into the left lungs of Rag1<sup>-/-</sup> mice and tumors were allowed to establish for 2 weeks. A pre-treatment  $\mu$ CT image was acquired, the mice were randomized into treatment groups (n=8) and treated daily by oral gavage with diluent control or alectinib (20 mg/kg). Tumor volume was monitored by serial  $\mu$ CT and the average tumor volumes (means and SEM) presented as fold-change from initial volumes. **b**, EA2 cells (500,000 cells/mouse) were inoculated into the left lungs of C57BL/6 mice and tumors were allowed to establish for 10 days. Pre-treatment  $\mu$ CT images were obtained and the mice were treated with alectinib (20 mg/kg) daily for 31 days at which point no lung tumors were detectable by  $\mu$ CT imaging. Treatment was terminated and 44 days later, 500,000 LLC cells (n=5) or EA2 cells (n=5) were injected into the right flanks of the EA2 tumor-bearing and treated mice (rechallenge) as well as naïve mice (n=2 for each cell line). The tumor volumes of the flank tumors was monitored with calipers for 3 (LLC tumors) and 4 (EA2 tumors) weeks, respectively.

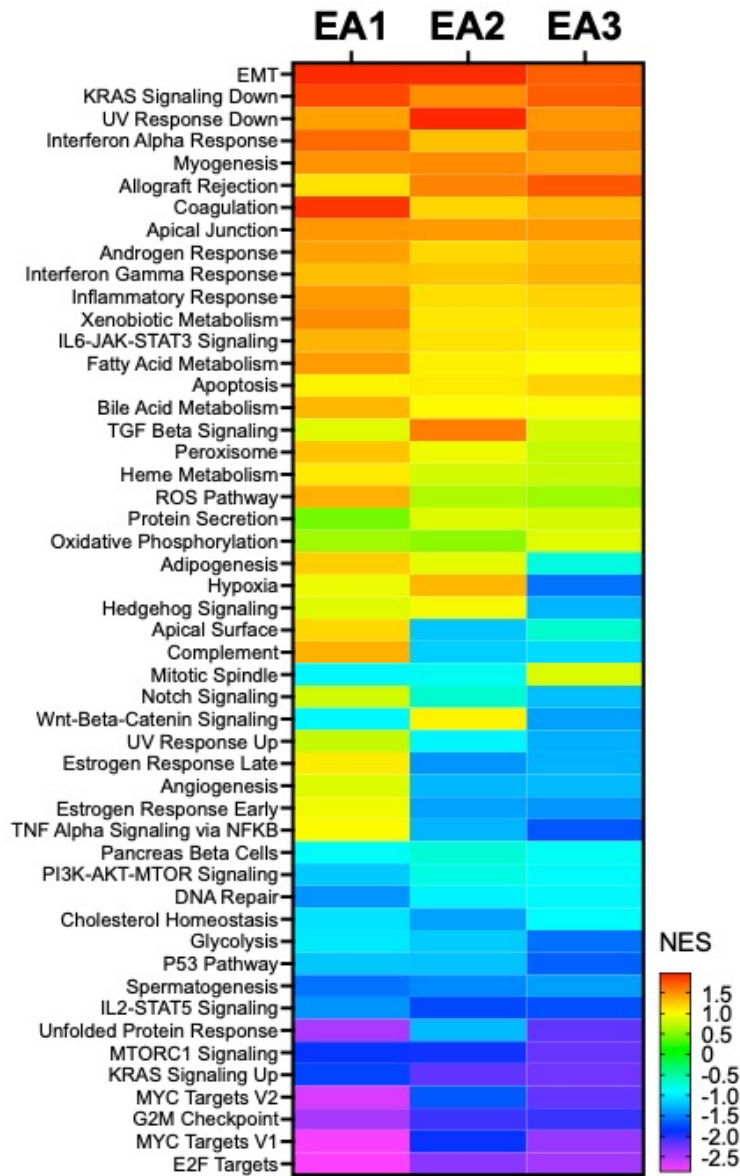

**Supplementary Figure 4. Gene-set enrichment analysis of RNAseq data from murine EML4-ALK cell lines treated *in vitro* with alectinib.** RNA was purified from EA1, EA2 and EA3 cells treated *in vitro* with DMSO or alectinib (100 nM) for 1-5 days and submitted for RNAseq. For this analysis, the different time points were considered as replicates (n=4) and DMSO vs. alectinib-treated samples analyzed with GSEA using the Hallmark Pathways. The heatmap presents the normalized enrichment scores (NES) in the alectinib-treated samples (see color bar for relative scores).

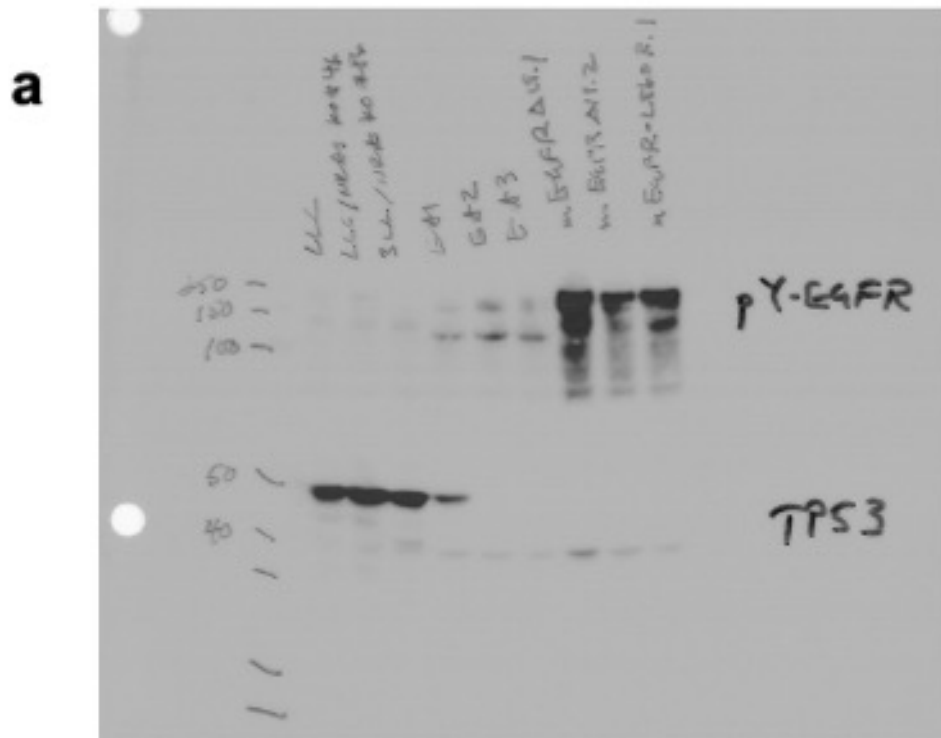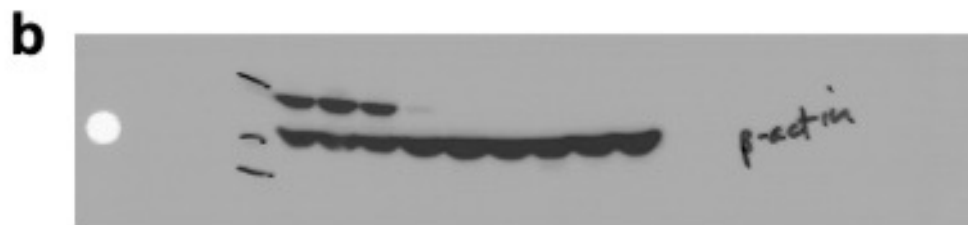

**Supplementary Figure 5. Uncropped and unprocessed scans of immunoblots in Supplementary Figure 2c.** In **a**, the indicated samples were probed for phospho-tyrosine EGFR (top portion of blot) or murine TP53 (bottom portion of blot). In **b**, the bottom portion of the blot was reprobed for b-actin. Residual TP53 antibody remained after stripping and accounts for the top band in the first 4 lanes.
